# Supplementary material for: Can Lunar and Martian Soils Support Food Plant Production? Effects of Horse/Swine Monogastric Manure Fertilisation on Regolith Simulants Enzymatic Activity, Nutrient Bioavailability, and Lettuce Growth
Source: MDPI journal article supplement (doi:10.3390/plants11233345), 2022-12-02
Supplement: s1 [file s1]

# Can Lunar and Martian Soils Support Food Plant Production? Effects of Horse/Swine Monogastric Manure Fertilisation on Regolith Simulants Enzymatic Activity, Nutrient Bioavailability, and Lettuce Growth

Antonio G. Caporale <sup>1,\*†</sup>, Mariana Amato <sup>2,†</sup>, Luigi G. Duri <sup>1</sup>, Rocco Bochicchio <sup>2</sup>, Stefania De Pascale <sup>1</sup>, Giuseppe Di Rauso Simeone <sup>1</sup>, Mario Palladino <sup>1</sup>, Antonio Pannico <sup>1</sup>, Maria A. Rao <sup>1</sup>, Youssef Rouphael <sup>1,\*</sup> and Paola Adamo <sup>1</sup>

<sup>1</sup> Department of Agricultural Sciences, University of Naples Federico II, 80055 Portici, Italy

<sup>2</sup> School of Agriculture, Forestry, Food and Environmental Sciences, University of Basilicata, 85100 Potenza, Italy

\* Correspondence: ag.caporale@unina.it (A.G.C.); youssef.rouphael@unina.it (Y.R.)

† These authors contributed equally to this work.

---

SUPPLEMENTARY MATERIAL

**Table S1.** Summary of mineralogical and elemental composition and main physico-hydraulic and chemical properties of MMS-1 and LHS-1 simulants, horse/swine monogastric manure, and mixtures of MMS-1 or LHS-1 simulants and manure (simulant/manure rates: 100:0, 90:10, 70:30, 50:50; w/w %)

|                                         | MMS-1                                                                                                                                                                                                                                                                                                                                                                                                                                                                                                                                                                          | LHS-1                                                                                                | Horse/swine monogastric manure                                                                                              |
|-----------------------------------------|--------------------------------------------------------------------------------------------------------------------------------------------------------------------------------------------------------------------------------------------------------------------------------------------------------------------------------------------------------------------------------------------------------------------------------------------------------------------------------------------------------------------------------------------------------------------------------|------------------------------------------------------------------------------------------------------|-----------------------------------------------------------------------------------------------------------------------------|
| Mineralogical composition               | Plagioclase, amorphous minerals and zeolite (main), hematite and smectite (secondary)                                                                                                                                                                                                                                                                                                                                                                                                                                                                                          | Plagioclase and amorphous minerals (main), kaolinite and chlorite (secondary)                        |                                                                                                                             |
| Elemental composition                   | Si, Al, Fe, Ca, Mg, K, Na, P and Mn (macroelements), Ni, Cr, V, Zn, Cu and Pb (microelements)                                                                                                                                                                                                                                                                                                                                                                                                                                                                                  | Si, Al, Ca, Fe, Na, Mg, K, P, Mn and S (macroelements), Ni, Cr, V, Cu, Zn and Pb (microelements)     | C, Ca, N, S, P, Fe, Mg, Na, Al, and Mn (macroelements), Zn, Cu, Cr, Pb, V and Ni (microelements)                            |
| Physico-hydraulic properties            | Coarse textured substrate with high macroporosity and low water holding capacity                                                                                                                                                                                                                                                                                                                                                                                                                                                                                               | Coarse textured substrate with high macroporosity and low water holding capacity                     | Porous medium with high water holding capacity                                                                              |
| Chemical properties                     | Alkaline pH (8.9), low EC and CEC, source of bioavailable Ca, Mg and K, low bioavailability of PTE                                                                                                                                                                                                                                                                                                                                                                                                                                                                             | Alkaline pH (9.7), very low EC and CEC, source of bioavailable Ca, medium-low bioavailability of PTE | Alkaline pH (9.0), high EC and CEC, source of bioavailable K, Ca, Mg, N, P, Fe, S and Mn, medium-low bioavailability of PTE |
| MMS-1/manure mixtures (main properties) | Alkaline pH (8.9-9.0), low-to-high EC (0.3-3.3 dS m <sup>-1</sup> ), CEC (8-23 cmol+ kg <sup>-1</sup> ) and bioavailability of plant nutrients. Enhanced physico-hydraulic properties with increasing rates of manure in the mixture up to 30% in weight, then they got worst in the 50:50 w:w mixture. MMS-1/manure mixtures are better than LHS-1/manure ones in terms of chemical fertility (lower pHs and higher nutrient availability); this divergent fertility was particularly evident at 90:10 w:w rate and tended to be mitigated by increasing the levels of manure |                                                                                                      |                                                                                                                             |
| LHS-1/manure mixtures (main properties) | Alkaline pH (9.3-9.7), low-to-high EC (0.1-3.7 dS m <sup>-1</sup> ), CEC (1-22 cmol+ kg <sup>-1</sup> ) and bioavailability of plant nutrients. Enhanced physico-hydraulic properties with increasing rates of manure in the mixture up to 30% in weight, then they got worst in the 50:50 w:w mixture. LHS-1/manure mixtures are better than MMS-1/manure ones in terms of water retention, especially in the 'dry' region of matrix potential head (between -100 and -600 cm)                                                                                                |                                                                                                      |                                                                                                                             |

*The mineralogical and elemental compositions of two simulants were assessed by X-ray powder diffraction (XRPD), wavelength- and energy-dispersive X-ray fluorescence (WD- and ED-XRF), respectively. The elemental profile of horse/swine monogastric manure was determined by CHNS elemental analyser and inductively coupled plasma - optical emission spectrometry (ICP-OES), after acid digestion in a microwave-assisted digestion system. Physico-hydraulic and chemical properties were assessed according to internationally harmonised and standardised analytical protocols for characterisation of soil/substrate samples. EC indicates electrical conductivity, CEC: cation exchange capacity and PTE: potentially toxic elements.*

**Table S2.** Concentration (mg kg<sup>-1</sup> DW) of main macro and micronutrients in different mixtures of MMS-1 or LHS-1 simulants and manure (simulant/manure rates: 100:0, 90:10, 70:30, 50:50; w/w %), separated in rhizo and bulk soil after lettuce growth, extracted by 0.05M EDTA at pH 7 (n=3).

| Source of Variance      | Ca                     | K      | Mg     | P      | Fe     | Na     | Mn     | Cu     | Zn     |
|-------------------------|------------------------|--------|--------|--------|--------|--------|--------|--------|--------|
|                         | mg kg <sup>-1</sup> DW |        |        |        |        |        |        |        |        |
| Simulants (S)           |                        |        |        |        |        |        |        |        |        |
| MMS1                    | 11756                  | 770    | 772    | 687    | 222    | 119    | 115    | 6.03   | 21.5   |
| LHS1                    | 7981                   | 460    | 514    | 556    | 356    | 150    | 45.5   | 6.00   | 21.1   |
|                         | ***                    | ***    | ***    | ***    | ***    | **     | ***    | ns     | ns     |
| Amendment % (M)         |                        |        |        |        |        |        |        |        |        |
| 0                       | 2794 d                 | 85.3 d | 235 d  | 124 d  | 18.0 c | 87.8 c | 12.9 d | 0.72 d | 1.13 d |
| 10                      | 6659 c                 | 333 c  | 418 c  | 404 c  | 230 b  | 93.8 c | 81.0 c | 4.75 c | 10.0 c |
| 30                      | 13981 b                | 715 b  | 863 b  | 934 b  | 452 a  | 131 b  | 109 b  | 8.42 b | 29.0 b |
| 50                      | 16039 a                | 1326 a | 1055 a | 1025 a | 455 a  | 226 a  | 118 a  | 10.2 a | 45.1 a |
|                         | ***                    | ***    | ***    | ***    | ***    | ***    | ***    | ***    | ***    |
| Rhizo vs bulk soil (RB) |                        |        |        |        |        |        |        |        |        |
| RH                      | 9933                   | 521    | 598    | 626    | 297    | 129    | 80.0   | 6.30   | 21.6   |
| BK                      | 9803                   | 709    | 687    | 617    | 280    | 140    | 80.7   | 5.73   | 21.1   |
|                         | ns                     | ***    | ***    | ns     | ns     | ns     | ns     | **     | ns     |
| S x M x RB              |                        |        |        |        |        |        |        |        |        |
| MMS1 x 0 x RH           | 5065                   | 159    | 420    | 245    | 14.8   | 83.2   | 25.8 f | 0.80   | 2.14   |
| MMS1 x 0 x BK           | 5244                   | 169    | 445    | 240    | 9.77   | 88.4   | 21.2 f | 0.70   | 1.09   |
| MMS1 x 10 x RH          | 8753                   | 389    | 555    | 477    | 107    | 93.2   | 131 c  | 4.02   | 9.28   |
| MMS1 x 10 x BK          | 9135                   | 548    | 662    | 491    | 115    | 96.9   | 146 b  | 4.02   | 9.72   |
| MMS1 x 30 x RH          | 15781                  | 678    | 884    | 980    | 353    | 111    | 151 ab | 9.15   | 29.0   |
| MMS1 x 30 x BK          | 15759                  | 1133   | 1050   | 994    | 361    | 123    | 158 a  | 8.55   | 29.6   |
| MMS1 x 50 x RH          | 17170                  | 1270   | 950    | 1062   | 417    | 157    | 146 b  | 11.50  | 47.3   |
| MMS1 x 50 x BK          | 17139                  | 1815   | 1206   | 1006   | 395    | 202    | 143 b  | 9.48   | 44.0   |
| LHS1 x 0 x RH           | 430                    | 8.65   | 47.4   | 5.74   | 23.2   | 89.9   | 2.28 g | 0.67   | 0.66   |
| LHS1 x 0 x BK           | 435                    | 4.29   | 25.7   | 4.15   | 24.1   | 89.5   | 2.37 g | 0.69   | 0.64   |
| LHS1 x10 x RH           | 4607                   | 173    | 209.2  | 338    | 367    | 93.2   | 24.4 f | 5.38   | 11.16  |
| LHS1 x 10 x BK          | 4142                   | 223    | 246    | 311    | 332    | 91.8   | 22.9 f | 5.58   | 9.95   |
| LHS1 x 30 x RH          | 12267                  | 465    | 703    | 899    | 567    | 136    | 66.2 e | 8.48   | 28.7   |
| LHS1 x 30 x BK          | 12117                  | 586    | 815    | 862    | 526    | 153    | 62.1 e | 7.50   | 28.8   |
| LHS1 x 50 x RH          | 15394                  | 1023   | 1017   | 1003   | 526    | 268    | 93.1 d | 10.4   | 44.1   |
| LHS1 x 50 x BK          | 14452                  | 1196   | 1047   | 1029   | 480    | 276    | 90.5 d | 9.31   | 45.0   |
|                         | ns                     | ns     | ns     | ns     | ns     | ns     | *      | ns     | ns     |
| S x M                   | ***                    | ns     | ***    | ***    | ***    | *      | ***    | ***    | ns     |

*For the sake of clarity, this wide table shows only the mean values, not followed by standard deviations. Non-significant (ns). \*, \*\*, \*\*\* Significant at  $P \leq 0.05$ , 0.01, and 0.001, respectively. Simulants (S), Amendment (M) and Rhizo vs bulk soil (RB) and interaction were compared by Duncan's multiple-range test ( $P = 0.05$ ). Different lowercase letters within each column indicate significant differences ( $P \leq 0.05$ ).*

**Table S3.** NH<sub>4</sub>NO<sub>3</sub>-extractable fraction (expressed as % of the total content) of main macro and micronutrients in different mixtures of MMS-1 or LHS-1 simulants and manure (simulant/manure rates: 100:0, 90:10, 70:30, 50:50; w/w %), separated in rhizo and bulk soil after lettuce growth (n=3).

| Source of Variance             | Ca                     | K      | Mg    | P      | Fe       | Na     | Mn     | Cu      | Zn      |
|--------------------------------|------------------------|--------|-------|--------|----------|--------|--------|---------|---------|
|                                | % of the total content |        |       |        |          |        |        |         |         |
| <i>Simulants (S)</i>           |                        |        |       |        |          |        |        |         |         |
| MMS1                           | 5.2                    | 4.4    | 2.2   | 0.41   | 0.002    | 0.20   | 0.22   | 0.32    | 0.11    |
| LHS1                           | 2.4                    | 2.8    | 1.4   | 0.27   | 0.003    | 0.34   | 0.09   | 0.37    | 0.16    |
|                                | ***                    | ***    | ***   | ***    | **       | ***    | ***    | *       | **      |
| <i>Amendment (M)</i>           |                        |        |       |        |          |        |        |         |         |
| 0                              | 3.4 c                  | 0.5 d  | 0.6 d | 0.01 d | <0.001 c | 0.10 c | 0.03 b | 0.14 c  | 0.06 b  |
| 10                             | 4.0 a                  | 1.9 c  | 1.0 c | 0.39 c | 0.001 c  | 0.10 c | 0.20 a | 0.38 b  | 0.15 a  |
| 30                             | 4.0 a                  | 4.1 b  | 2.0 b | 0.51 a | 0.003 b  | 0.17 b | 0.20 a | 0.40 b  | 0.16 a  |
| 50                             | 3.7 b                  | 7.9 a  | 3.6 a | 0.45 b | 0.005 a  | 0.72 a | 0.21 a | 0.46 a  | 0.17 a  |
|                                | *                      | ***    | ***   | ***    | *        | ***    | **     | ***     | **      |
| <i>Rhizo vs bulk soil (RB)</i> |                        |        |       |        |          |        |        |         |         |
| RH                             | 3.7                    | 3.0    | 1.6   | 0.32   | 0.003    | 0.24   | 0.16   | 0.34    | 0.12    |
| BK                             | 3.9                    | 4.2    | 2.0   | 0.36   | 0.002    | 0.30   | 0.16   | 0.35    | 0.14    |
|                                | ns                     | ***    | **    | **     | *        | ***    | ns     | ns      | *       |
| <i>S x M x RB</i>              |                        |        |       |        |          |        |        |         |         |
| MMS1 x 0 x RH                  | 5.6                    | 0.8 h  | 1.1   | 0.01   | <0.001 e | 0.09   | 0.01   | 0.19 d  | 0.05 f  |
| MMS1 x 0 x BK                  | 6.1                    | 1.1 h  | 1.2   | 0.01   | <0.001 e | 0.12   | 0.01   | 0.19 d  | 0.06 f  |
| MMS1 x 10 x RH                 | 5.8                    | 2.4 g  | 1.5   | 0.47   | <0.001 e | 0.10   | 0.30   | 0.31 c  | 0.09 e  |
| MMS1 x 10 x BK                 | 5.6                    | 3.2 ef | 1.6   | 0.59   | 0.001 de | 0.11   | 0.32   | 0.34 c  | 0.14 cd |
| MMS1 x 30 x RH                 | 5.1                    | 3.8 e  | 2.1   | 0.61   | 0.002 d  | 0.12   | 0.29   | 0.37 c  | 0.12 d  |
| MMS1 x 30 x BK                 | 4.7                    | 6.3 d  | 2.5   | 0.64   | 0.002 d  | 0.16   | 0.28   | 0.36 c  | 0.14 cd |
| MMS1 x 50 x RH                 | 4.4                    | 7.2 c  | 3.4   | 0.45   | 0.005 b  | 0.36   | 0.31   | 0.43 b  | 0.14 cd |
| MMS1 x 50 x BK                 | 4.3                    | 10.3 a | 4.1   | 0.49   | 0.003 c  | 0.57   | 0.29   | 0.39 bc | 0.16 c  |
| LHS1 x 0 x RH                  | 0.9                    | 0.1 i  | 0.2   | 0.01   | <0.001 e | 0.10   | 0.06   | 0.09 e  | 0.06 f  |
| LHS1 x 0 x BK                  | 1.1                    | 0.1 i  | 0.1   | 0.01   | <0.001 e | 0.10   | 0.05   | 0.10 e  | 0.06 f  |
| LHS1 x10 x RH                  | 2.1                    | 0.8 h  | 0.3   | 0.18   | 0.002 c  | 0.09   | 0.08   | 0.35 c  | 0.12 d  |
| LHS1 x 10 x BK                 | 2.5                    | 1.3 h  | 0.5   | 0.31   | 0.002 c  | 0.08   | 0.10   | 0.51 a  | 0.25 a  |
| LHS1 x 30 x RH                 | 3.0                    | 2.7 fg | 1.5   | 0.42   | 0.006 ab | 0.16   | 0.12   | 0.48 a  | 0.20 b  |
| LHS1 x 30 x BK                 | 3.4                    | 3.3 ef | 1.9   | 0.35   | 0.004 bc | 0.23   | 0.11   | 0.38 bc | 0.17 c  |
| LHS1 x 50 x RH                 | 3.1                    | 6.3 d  | 3.1   | 0.42   | 0.007 a  | 0.90   | 0.14   | 0.53 a  | 0.20 b  |
| LHS1 x 50 x BK                 | 3.2                    | 7.9 b  | 3.6   | 0.44   | 0.006 ab | 1.04   | 0.11   | 0.49 a  | 0.18 bc |
|                                | ns                     | *      | ns    | ns     | **       | ns     | ns     | **      | **      |
| <i>S x M</i>                   | ***                    | **     | ***   | ***    | **       | ***    | **     | ***     | ***     |

For the sake of clarity, this wide table shows only the mean values, not followed by standard deviations. Non-significant (ns). \*, \*\*, \*\*\* Significant at  $P \leq 0.05$ , 0.01, and 0.001, respectively. Simulants (S), Amendment (M) and Rhizo vs bulk soil (RB) and interaction were compared by Duncan's multiple-range test ( $P = 0.05$ ). Different lowercase letters within each column indicate significant differences ( $P \leq 0.05$ ).

**Table S4.** EDTA-extractable fraction (expressed as % of the total content) of main macro and micro-nutrients in different mixtures of MMS-1 or LHS-1 simulants and manure (simulant/manure rates: 100:0, 90:10, 70:30, 50:50; w/w %), separated in rhizo and bulk soil after lettuce growth (n=3).

| Source of Variance             | Ca                     | K      | Mg    | P      | Fe     | Na    | Mn     | Cu     | Zn     |
|--------------------------------|------------------------|--------|-------|--------|--------|-------|--------|--------|--------|
|                                | % of the total content |        |       |        |        |       |        |        |        |
| <i>Simulants (S)</i>           |                        |        |       |        |        |       |        |        |        |
| MMS1                           | 25.9                   | 4.4    | 4.1   | 29.0   | 0.5    | 0.5   | 16.5   | 12.6   | 23.0   |
| LHS1                           | 16.7                   | 2.6    | 2.9   | 18.7   | 0.8    | 0.7   | 6.7    | 12.8   | 22.6   |
|                                | ***                    | ***    | ***   | ***    | ***    | **    | ***    | ns     | ns     |
| <i>Amendment (M)</i>           |                        |        |       |        |        |       |        |        |        |
| 0                              | 8.0 c                  | 0.5 d  | 0.9 d | 14.2 d | <0.1 d | 0.3 c | 1.7 d  | 2.3 c  | 2.2 d  |
| 10                             | 17.2 b                 | 1.9 c  | 1.8 c | 25.9 b | 0.4 c  | 0.3 c | 10.8 c | 13.1 b | 15.7 c |
| 30                             | 30.2 a                 | 4.1 b  | 4.5 b | 31.7 a | 1.0 b  | 0.6 b | 15.7 b | 17.9 a | 33.0 b |
| 50                             | 29.8 a                 | 7.6 a  | 6.8 a | 23.7 c | 1.3 a  | 1.2 a | 18.2 a | 17.6 a | 40.3 a |
|                                | ***                    | ***    | ***   | ***    | ***    | ***   | ***    | ***    | ***    |
| <i>Rhizo vs bulk soil (RB)</i> |                        |        |       |        |        |       |        |        |        |
| RH                             | 21.4                   | 3.0    | 3.3   | 24.0   | 0.7    | 0.6   | 11.5   | 13.2   | 23.1   |
| BK                             | 21.2                   | 4.1    | 3.8   | 23.7   | 0.7    | 0.6   | 11.6   | 12.2   | 22.5   |
|                                | ns                     | ***    | **    | ns     | ns     | ns    | ns     | **     | ns     |
| <i>S x M x RB</i>              |                        |        |       |        |        |       |        |        |        |
| MMS1 x 0 x RH                  | 14.5                   | 0.9 i  | 1.7   | 28.1   | <0.1   | 0.3   | 3.3    | 2.6    | 4.1    |
| MMS1 x 0 x BK                  | 15.0                   | 1.0 i  | 1.8   | 27.5   | <0.1   | 0.3   | 2.7    | 2.3    | 2.1    |
| MMS1 x 10 x RH                 | 22.6                   | 2.2 h  | 2.4   | 30.5   | 0.2    | 0.3   | 17.5   | 11.1   | 14.5   |
| MMS1 x 10 x BK                 | 23.6                   | 3.1 fg | 2.9   | 31.4   | 0.2    | 0.3   | 19.5   | 11.1   | 15.2   |
| MMS1 x 30 x RH                 | 34.1                   | 3.9 e  | 4.6   | 33.3   | 0.8    | 0.5   | 21.6   | 19.4   | 33.0   |
| MMS1 x 30 x BK                 | 34.1                   | 6.5 c  | 5.5   | 33.7   | 0.8    | 0.5   | 22.6   | 18.2   | 33.7   |
| MMS1 x 50 x RH                 | 31.9                   | 7.3 b  | 6.1   | 24.6   | 1.2    | 0.9   | 22.5   | 19.9   | 42.3   |
| MMS1 x 50 x BK                 | 31.9                   | 10.4 a | 7.7   | 23.3   | 1.1    | 1.1   | 22.0   | 16.4   | 39.3   |
| LHS1 x 0 x RH                  | 1.2                    | <0.1 j | 0.2   | 0.7    | <0.1   | 0.3   | 0.3    | 2.2    | 1.3    |
| LHS1 x 0 x BK                  | 1.2                    | <0.1 j | 0.1   | 0.5    | <0.1   | 0.3   | 0.3    | 2.2    | 1.2    |
| LHS1 x10 x RH                  | 11.9                   | 1.0 i  | 0.9   | 21.6   | 0.6    | 0.3   | 3.3    | 14.8   | 17.5   |
| LHS1 x 10 x BK                 | 10.7                   | 1.3 i  | 1.1   | 19.9   | 0.6    | 0.3   | 3.1    | 15.3   | 15.5   |
| LHS1 x 30 x RH                 | 26.5                   | 2.7 gh | 3.7   | 30.5   | 1.2    | 0.6   | 9.5    | 18.0   | 32.7   |
| LHS1 x 30 x BK                 | 26.2                   | 3.4 ef | 4.2   | 29.3   | 1.1    | 0.7   | 8.9    | 15.9   | 32.8   |
| LHS1 x 50 x RH                 | 28.6                   | 5.9 d  | 6.5   | 23.2   | 1.5    | 1.5   | 14.4   | 17.9   | 39.5   |
| LHS1 x 50 x BK                 | 26.9                   | 6.8 bc | 6.7   | 23.8   | 1.4    | 1.5   | 14.0   | 16.1   | 40.3   |
|                                | ns                     | **     | ns    | ns     | ns     | ns    | ns     | ns     | ns     |
| <i>S x M</i>                   | **                     | ***    | ***   | ***    | ***    | **    | ***    | **     | ns     |

For the sake of clarity, this wide table shows only the mean values, not followed by standard deviations. Non-significant (ns). \*, \*\*, \*\*\* Significant at  $P \leq 0.05$ , 0.01, and 0.001, respectively. Simulants (S), Amendment (M) and Rhizo vs bulk soil (RB) and interaction were compared by Duncan's multiple-range test ( $P = 0.05$ ). Different lowercase letters within each column indicate significant differences ( $P \leq 0.05$ ).

**Table S5.** Nutrient uptake in different mixtures of MMS-1 or LHS-1 simulants and manure (simulant/manure rates: 100:0, 90:10, 70:30, 50:50; w/w %).

| Source of Variance | PO <sub>4</sub>        | K             | Mg             | Ca            | SO <sub>4</sub> | Na             |
|--------------------|------------------------|---------------|----------------|---------------|-----------------|----------------|
|                    | mg plant <sup>-1</sup> |               |                |               |                 |                |
| Simulants (S)      |                        |               |                |               |                 |                |
| MMS1               | 21.2 ± 3.97            | 121 ± 20.3    | 7.20 ± 1.160   | 29.7 ± 5.04   | 3.48 ± 0.69     | 8.72 ± 1.61    |
| LHS1               | 5.54 ± 1.41            | 35.9 ± 8.7    | 2.76 ± 0.612   | 8.40 ± 2.04   | 1.02 ± 0.27     | 2.34 ± 0.53    |
|                    | ***                    | ***           | ***            | ***           | ***             | ***            |
| Amendment % (M)    |                        |               |                |               |                 |                |
| 0                  | 0.24 ± 0.04 c          | 6.92 ± 1.1 c  | 0.68 ± 0.071 d | 1.55 ± 0.23 d | 0.09 ± 0.01 b   | 0.56 ± 0.08 c  |
| 10                 | 16.9 ± 3.32 b          | 104 ± 18.3 a  | 6.38 ± 0.883 b | 25.9 ± 5.56 b | 2.65 ± 0.44 a   | 6.55 ± 1.53 b  |
| 30                 | 22.2 ± 5.73 a          | 117 ± 26.2 a  | 7.74 ± 1.250 a | 30.9 ± 6.55 a | 3.41 ± 0.88 a   | 9.10 ± 2.68 a  |
| 50                 | 14.1 ± 5.52 b          | 84.9 ± 33.2 b | 5.14 ± 1.883 c | 18.0 ± 6.99 c | 2.84 ± 1.16 a   | 5.89 ± 1.89 b  |
|                    | ***                    | ***           | ***            | ***           | ***             | ***            |
| S × M              |                        |               |                |               |                 |                |
| MMS1 × 0           | 0.32 ± 0.04 d          | 9.19 ± 1.1 d  | 0.82 ± 0.053 d | 2.01 ± 0.24 e | 0.11 ± 0.01 e   | 0.66 ± 0.10 d  |
| MMS1 × 10          | 23.6 ± 2.93 b          | 141 ± 14.1 b  | 8.22 ± 0.492 b | 38.2 ± 0.81 b | 3.12 ± 0.82 b   | 9.11 ± 1.94 b  |
| MMS1 × 30          | 34.9 ± 1.54 a          | 174 ± 9.8 a   | 10.5 ± 0.350 a | 45.3 ± 2.25 a | 5.35 ± 0.39 a   | 15.0 ± 0.68 a  |
| MMS1 × 50          | 26.1 ± 2.94 b          | 157 ± 15.4 ab | 9.26 ± 0.871 b | 33.4 ± 2.35 c | 5.33 ± 0.70 a   | 10.1 ± 0.14 b  |
| LHS1 × 0           | 0.15 ± 0.02 d          | 4.66 ± 0.4 d  | 0.54 ± 0.046 d | 1.10 ± 0.10 e | 0.07 ± 0.01 e   | 0.47 ± 0.10 d  |
| LHS1 × 10          | 10.3 ± 1.57 c          | 67.4 ± 10.0 c | 4.53 ± 0.500 c | 13.6 ± 1.34 d | 2.19 ± 0.28 bc  | 3.99 ± 1.21 c  |
| LHS1 × 30          | 9.57 ± 1.29 c          | 59.2 ± 5.4 c  | 4.97 ± 0.047 c | 16.4 ± 0.73 d | 1.47 ± 0.04 cd  | 3.23 ± 0.93 cd |
| LHS1 × 50          | 2.15 ± 0.23 d          | 12.2 ± 0.6 d  | 1.02 ± 0.095 d | 2.52 ± 0.16 e | 0.35 ± 0.02 de  | 1.66 ± 0.10 cd |
|                    | ***                    | ***           | ***            | ***           | ***             | ***            |

Non-significant (ns). \*, \*\*, \*\*\* Significant at  $P \leq 0.05$ , 0.01, and 0.001, respectively. Simulants (S), Amendment (M) and Rhizo vs bulk soil (RB) and interaction were compared by Duncan's multiple-range test ( $P = 0.05$ ). Different lowercase letters within each column indicate significant differences ( $P \leq 0.05$ ).

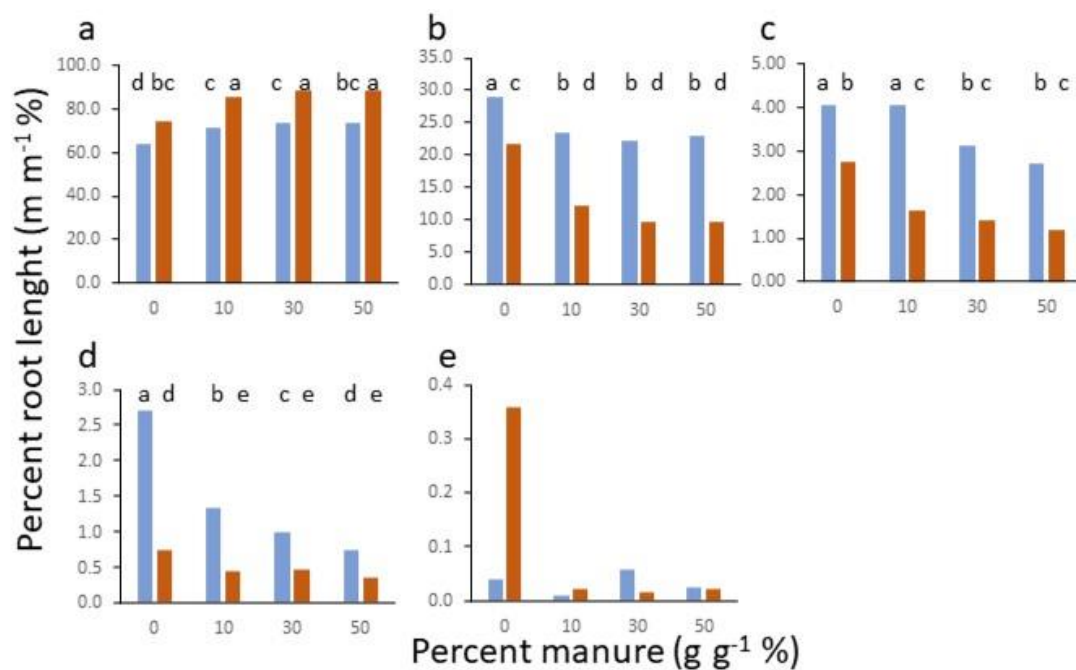

**Figure S1.** Interaction of simulant x manure concentration on percentage of total root length in each of ten diameter classes: a:  $D \leq 0.5$  mm; b:  $0.5 < D \leq 1$  mm; c:  $1 < D \leq 1.5$  mm; d:  $1.5 < D \leq 4.5$  mm; e:  $D > 4$  mm. Orange bars: MMS1; blue bars: LHS1. Bars with different letters are different for  $P < 0.05$  at the post-hoc Duncan Multiple Range Test for  $p \leq 0.05$ .
